# Supplementary material for: Exploring the photoactive properties of promising MXenes for water splitting
Source: Royal Society of Chemistry journal article supplement (doi:10.1039/d4ta06852a), 2024-11-19
Supplement: d4ta06852a1.pdf [file d4ta06852a1.pdf]

# Exploring the Photoactive Properties of Promising MXenes for Water Splitting

Diego Ontiveros, Francesc Viñes and Carmen Sousa\*

*Departament de Ciència de Materials i Química Física & Institut de Química Teòrica i Computacional de la Universitat de Barcelona (IQTCUB), c/ Martí i Franquès 1-11, 08028 Barcelona, Spain.*

\*E-mail: [c.sousa@ub.edu](mailto:c.sousa@ub.edu)

**Fig. S1.** Phonons spectra along the  $\Gamma \rightarrow \mathbf{K} \rightarrow \mathbf{M} \rightarrow \Gamma$  k-points paths for the distorted phases of the S- and Se-terminated MXenes.

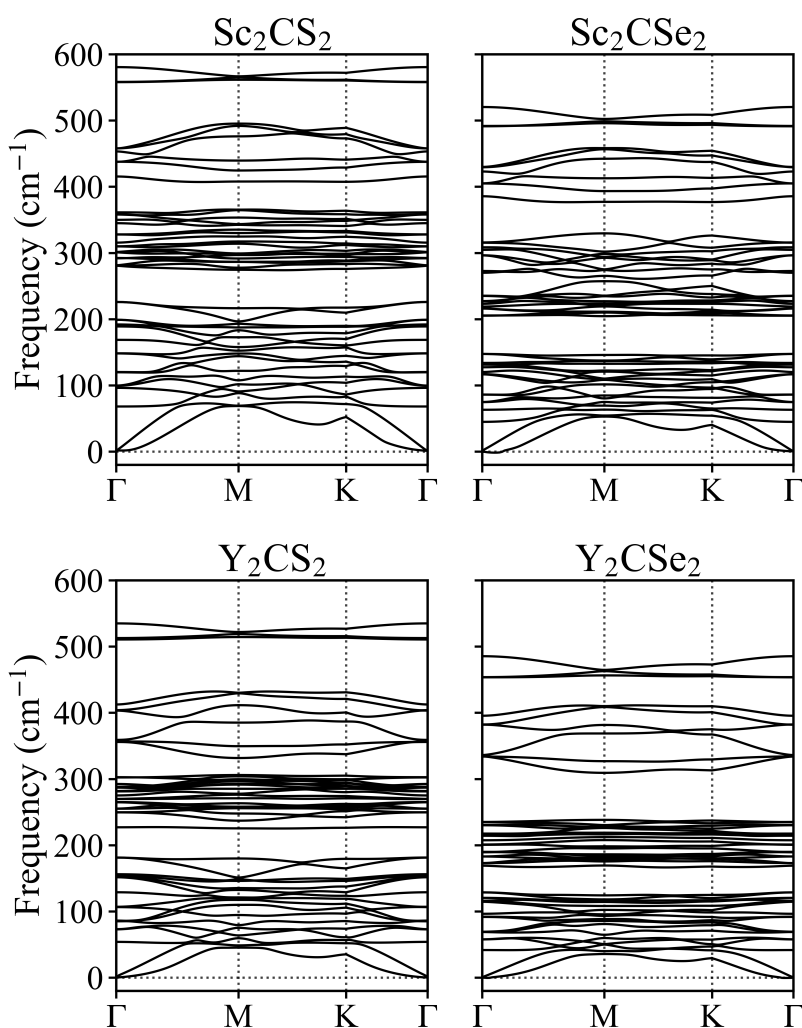

**Fig. S2** Phonons spectra along the  $\Gamma \rightarrow \mathbf{K} \rightarrow \mathbf{M} \rightarrow \Gamma$  k-points path for the  $\text{Zr}_2\text{CO}_2$  MXene in the excited triplet state.

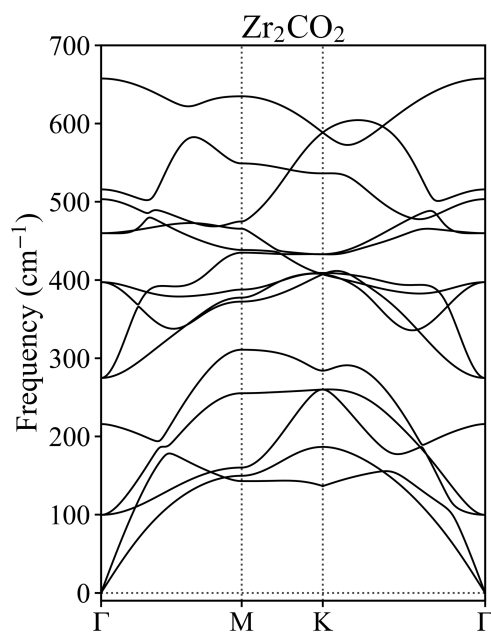

**Fig. S3.** PBE0 Bandstructure and density of states (DOS) for the distorted MXenes structures, both projected onto the different atomic contributions. In grey, blue, and red are marked the TM, X, and T contributions, respectively, while in the case of the DOS, black denotes the total sum. The green arrow marks the bandgap, with its correspondent value, given in eV. The energies,  $E$ , also given in eV, are referenced to the Fermi level,  $E_F$ , here placed at the valence band maximum (VBM).

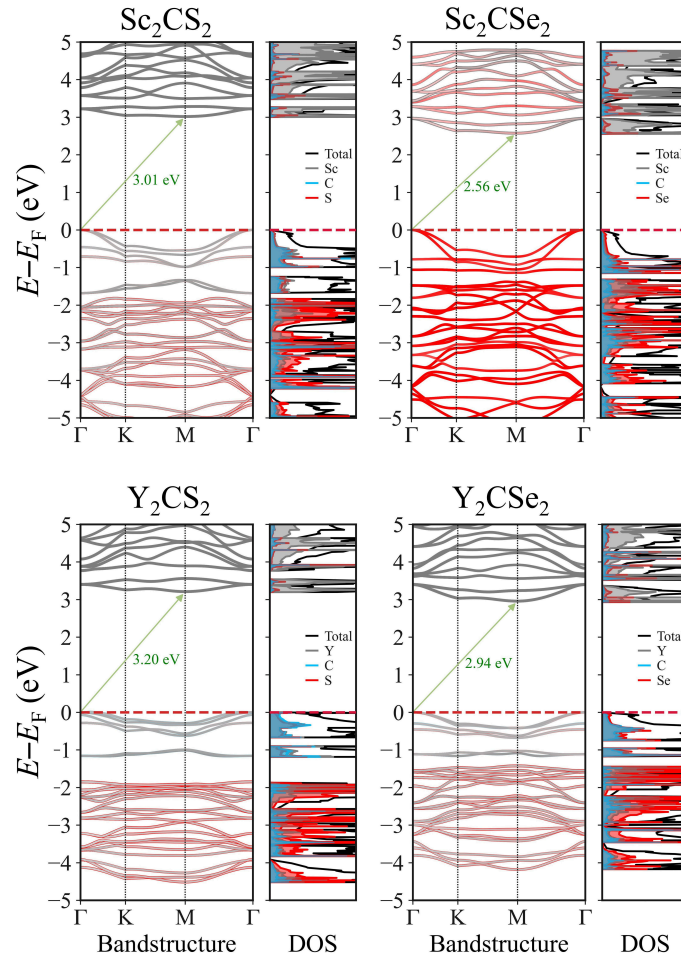

**Fig. S4.** VBM and conduction band minimum (CBM) alignments of the distorted chalcogen-terminated MXenes with respect to the water splitting redox potentials at  $pH = 0$  (dashed black lines) and  $pH = 7$  (grey dashed lines). The blue and orange bars represent the VB and CB, respectively. Since these are Janus materials, each surface has his own band alignment, the darker blue/orange, compels the average of both while the bars above and below it denote the CBM (light blue) or VBM (light orange), of the  $H_X$  and  $H_M$  surface, respectively.

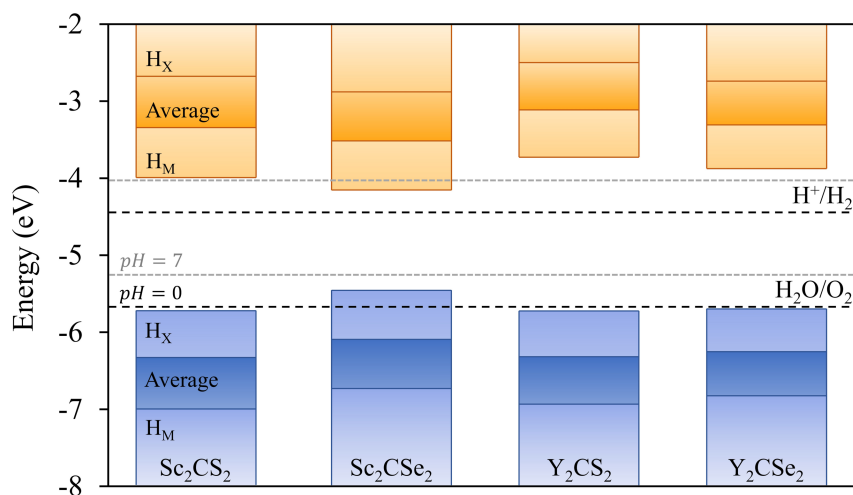

**Fig. S5.** Side views of partial charge densities for the VBM (blue) and CBM (orange) for the ten studied regular MXenes.

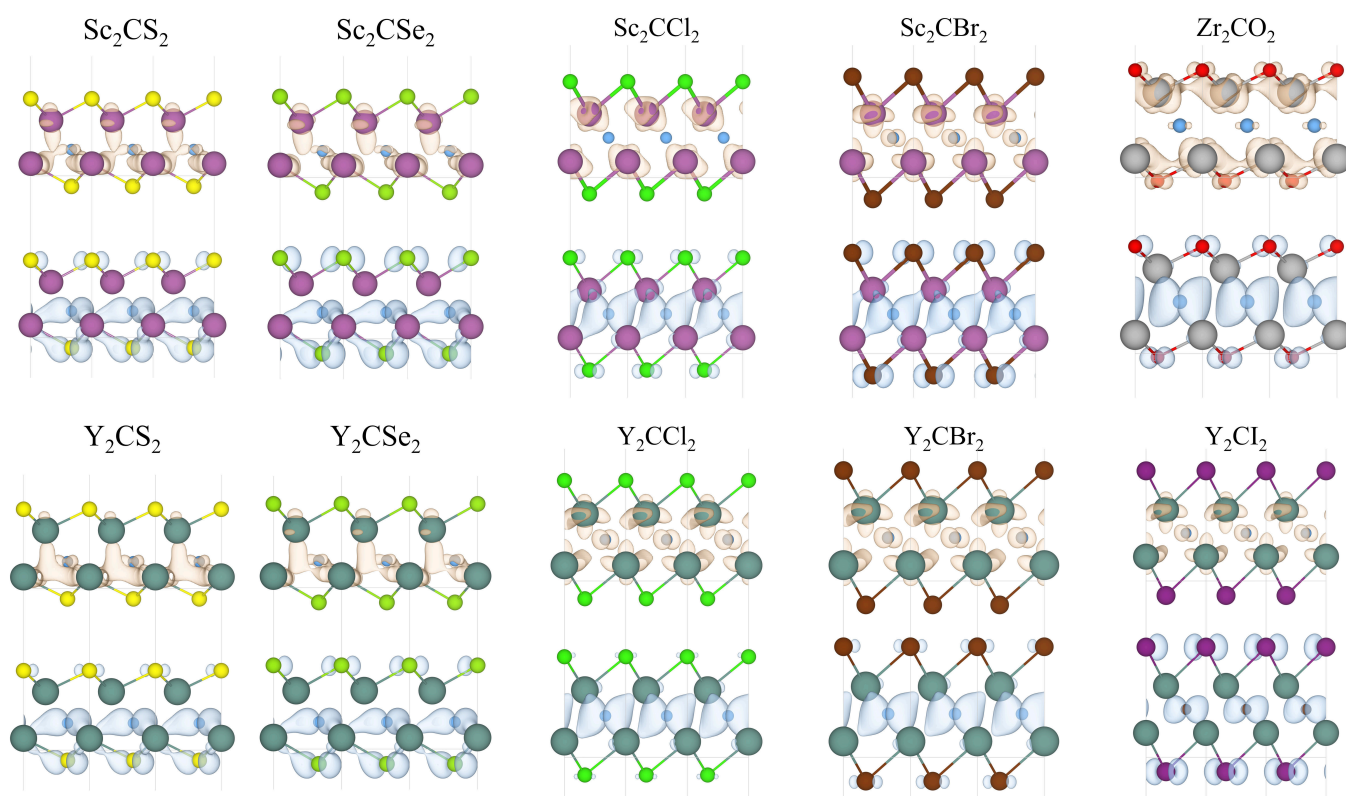

**Fig. S6.** (a) Partial charge densities for the VBM (blue) and CBM (orange) for the 4 distorted MXenes structures. (b) Spatial overlap,  $\hat{S}_{ab}$ , percentage between the VBM and CBM charge densities for the distorted MXenes.

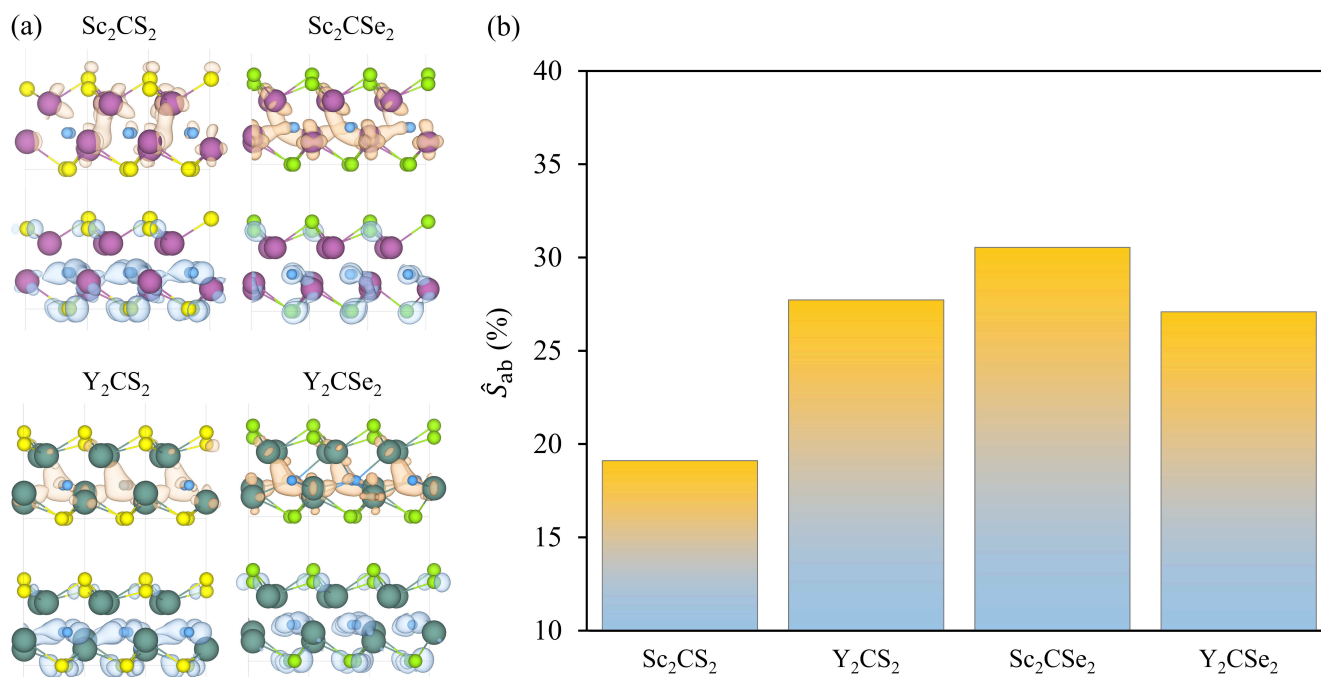

**Fig. S7.** (a) Total energy, and (b) band edge positions, both in eV, as a function of uniaxial strain along  $x$  and  $y$  directions, for the exemplary case of  $Y_2CCl_2$  MXene, with distinction for bands associated to photogenerated electron,  $e$ , or heavy,  $h^H$ , or light,  $h^L$ , holes.

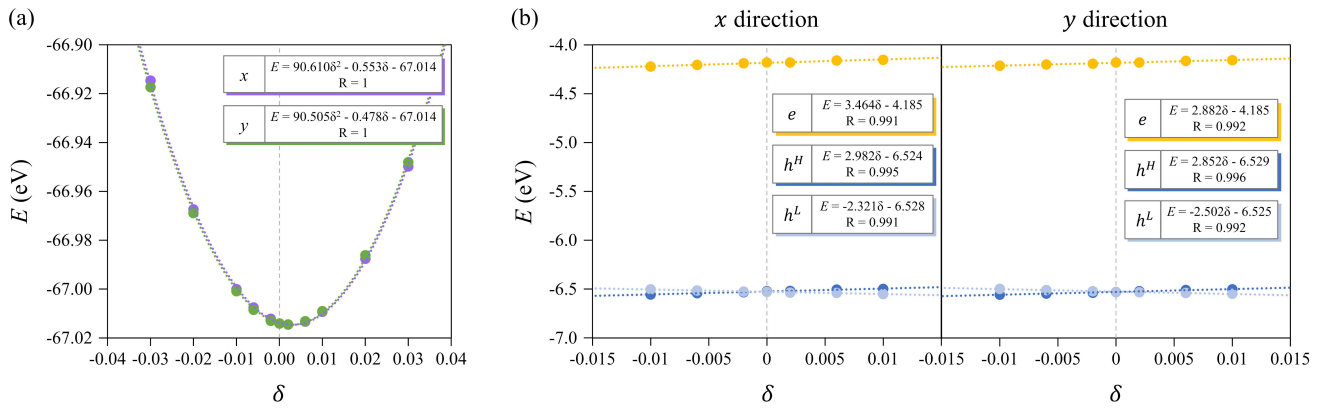

**Table S1.** Charge carrier properties for the distorted MXenes, where  $m_i^*$  is the carrier effective mass along the  $i$  transport direction, as a fraction w.r.t the free electron.  $C_{2D,i}$  is the elastic constant along the  $i$  transport direction in units of  $\text{N}\cdot\text{m}^{-1}$ ,  $E_{d,i}$  is the deformation potential constant along  $x$  and  $y$  directions, in units of eV, and  $\mu_i$  is the carrier mobility, in  $\text{cm}^2\cdot\text{V}^{-1}\cdot\text{s}^{-1}$  at  $T=300$  K. The  $e$ ,  $h^H$ , and  $h^L$  carriers denote the electron, heavy hole, and light hole, respectively.

| MXene                       | Carrier | $m_x^*$ | $m_y^*$ | $C_{2D,x}$ | $C_{2D,y}$ | $E_{d,x}$ | $E_{d,y}$ | $\mu_x$ | $\mu_y$ |
|-----------------------------|---------|---------|---------|------------|------------|-----------|-----------|---------|---------|
| $d\text{-Sc}_2\text{CS}_2$  | $e$     | 5.90    | 4.73    |            |            | -0.33     | 1.77      | 530.57  | 22.75   |
|                             | $h^H$   | 0.85    | 0.83    | 84.48      | 83.81      | 3.83      | 3.87      | 171.52  | 171.65  |
|                             | $h^L$   | 0.54    | 0.54    |            |            | -0.85     | -0.91     | 8492.93 | 7414.90 |
| $d\text{-Y}_2\text{CS}_2$   | $e$     | 2.17    | 1.87    |            |            | 0.79      | 2.79      | 590.98  | 55.04   |
|                             | $h^H$   | 1.38    | 1.48    | 75.10      | 76.12      | 4.62      | 4.25      | 38.31   | 42.70   |
|                             | $h^L$   | 1.34    | 1.33    |            |            | 1.18      | 0.98      | 642.05  | 954.56  |
| $d\text{-Sc}_2\text{CSe}_2$ | $e$     | 1.88    | 3.76    |            |            | -0.95     | 1.83      | 316.53  | 42.21   |
|                             | $h^H$   | 0.71    | 0.68    | 66.15      | 66.16      | 3.18      | 3.17      | 284.10  | 295.53  |
|                             | $h^L$   | 0.38    | 0.37    |            |            | -2.32     | -2.29     | 1868.35 | 1959.07 |
| $d\text{-Y}_2\text{CSe}_2$  | $e$     | 1.42    | 1.94    |            |            | 2.13      | 1.63      | 115.98  | 146.83  |
|                             | $h^H$   | 0.92    | 0.99    | 58.36      | 58.67      | 3.19      | 3.14      | 138.07  | 134.13  |
|                             | $h^L$   | 0.84    | 0.81    |            |            | -1.00     | -0.90     | 1784.75 | 2316.87 |



**Fig. S8.** Charge carrier mobility,  $\mu$ , in  $\text{cm}^2 \cdot \text{V}^{-1} \cdot \text{s}^{-1}$  for the electrons and heavy holes along the  $x$  (zigzag) and  $y$  (armchair) directions for the distorted MXenes. The orange and blue bars indicate the electron and heavy hole mobilities.

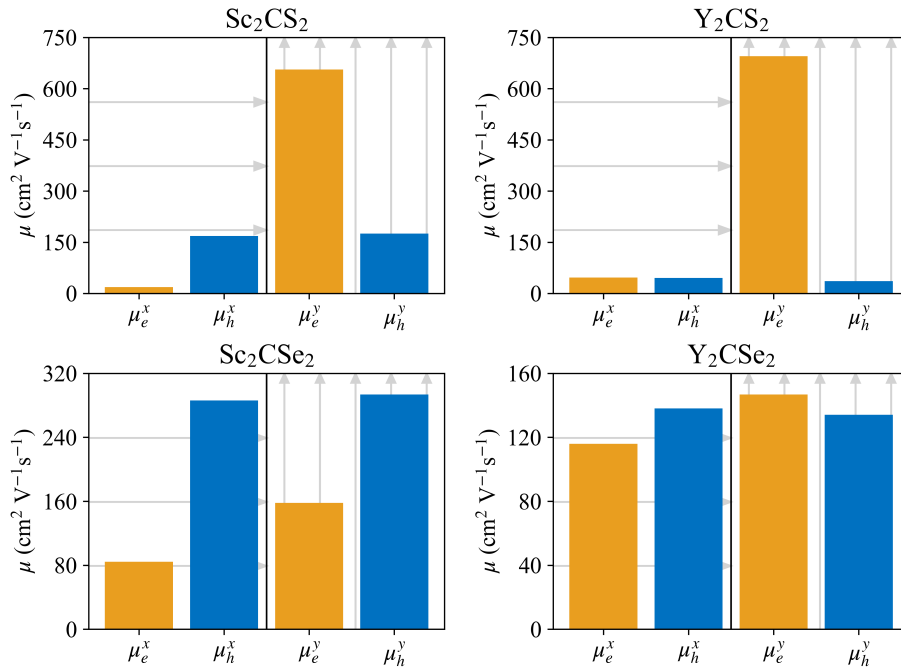

**Fig. S9.** Imaginary part of the dielectric function,  $\varepsilon_i$ , in arbitrary units, as a function of the photon energy,  $\omega$ , in eV. The dotted lines in the chalcogen-terminated MXenes represent the distorted structure values. The  $\text{Zr}_2\text{CO}_2$  values have been scaled down by a 2.5 factor for comparison purposes.

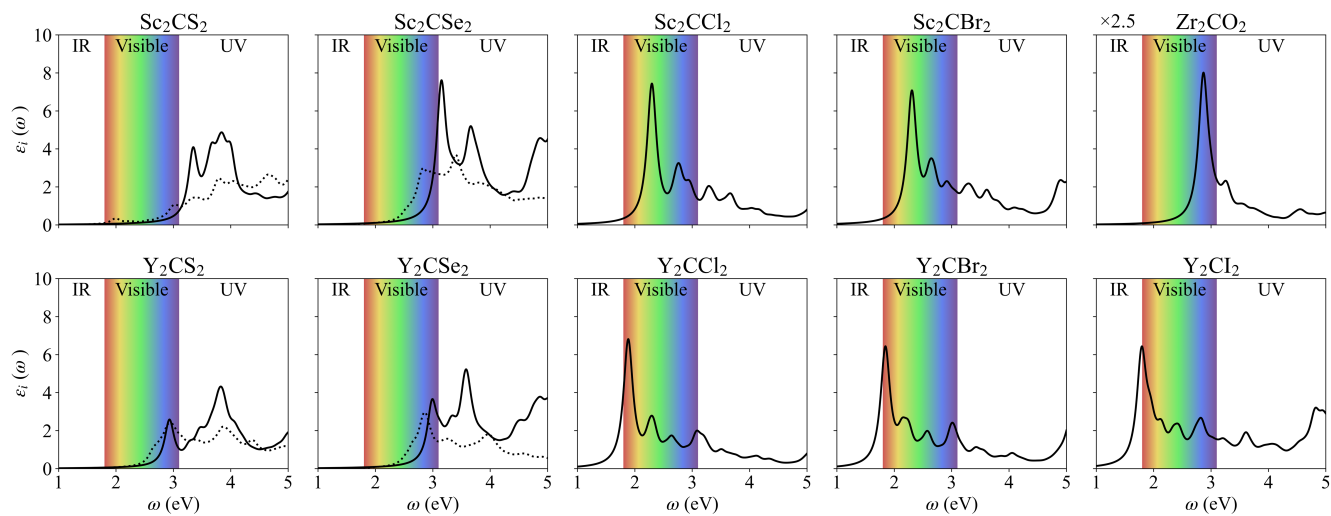

**Table S2.** Solar-to-hydrogen (STH) efficiency parameters, with  $\Delta\phi$  being the difference between the vacuum energies at the two surfaces of Janus MXenes,  $\chi_{\text{H}_2}$  and  $\chi_{\text{O}_2}$  being the hydrogen evolution reaction (HER) and oxygen evolution reaction (OER) overpotentials at  $pH = 7$ , respectively, all given in eV, and  $\eta_{\text{abs}}$ ,  $\eta_{\text{cu}}$ ,  $\eta_{\text{STH}}$  and  $\eta'_{\text{STH}}$  representing the efficiency of light absorption, carrier utilization, STH, and corrected STH, respectively, given in percentage.

| <b>MXene</b>                               | <b><math>\Delta\phi</math></b> | <b><math>\chi_{\text{H}_2}</math></b> | <b><math>\chi_{\text{O}_2}</math></b> | <b><math>\eta_{\text{abs}}</math></b> | <b><math>\eta_{\text{cu}}</math></b> | <b><math>\eta_{\text{STH}}</math></b> | <b><math>\eta'_{\text{STH}}</math></b> |
|--------------------------------------------|--------------------------------|---------------------------------------|---------------------------------------|---------------------------------------|--------------------------------------|---------------------------------------|----------------------------------------|
| Zr <sub>2</sub> CO <sub>2</sub>            | 0.00                           | 0.11                                  | 0.92                                  | 8.3                                   | 30.3                                 | 2.5                                   | 2.5                                    |
| Sc <sub>2</sub> CS <sub>2</sub>            | 1.20                           | 1.35                                  | 1.85                                  | 2.6                                   | 34.4                                 | 0.9                                   | 0.9                                    |
| Y <sub>2</sub> CS <sub>2</sub>             | 0.83                           | 1.48                                  | 1.54                                  | 7.2                                   | 37.9                                 | 2.7                                   | 2.7                                    |
| Sc <sub>2</sub> CSe <sub>2</sub>           | 1.19                           | 1.34                                  | 1.37                                  | 4.1                                   | 35.7                                 | 1.5                                   | 1.4                                    |
| Y <sub>2</sub> CSe <sub>2</sub>            | 0.91                           | 1.44                                  | 1.45                                  | 6.2                                   | 37.2                                 | 2.3                                   | 2.3                                    |
| Sc <sub>2</sub> CCL <sub>2</sub>           | 0.00                           | -0.19                                 | 1.44                                  | —                                     | —                                    | —                                     | —                                      |
| Y <sub>2</sub> CCL <sub>2</sub>            | 0.00                           | -0.07                                 | 1.27                                  | —                                     | —                                    | —                                     | —                                      |
| Sc <sub>2</sub> CBr <sub>2</sub>           | 0.00                           | -0.05                                 | 1.13                                  | —                                     | —                                    | —                                     | —                                      |
| Y <sub>2</sub> CBr <sub>2</sub>            | 0.00                           | -0.05                                 | 1.18                                  | —                                     | —                                    | —                                     | —                                      |
| Y <sub>2</sub> Cl <sub>2</sub>             | 0.00                           | 0.15                                  | 0.56                                  | 46.6                                  | 46.0                                 | 21.4                                  | 21.4                                   |
| <i>d</i> -Sc <sub>2</sub> CS <sub>2</sub>  | 1.31                           | 1.35                                  | 1.73                                  | 7.3                                   | 37.9                                 | 2.8                                   | 2.7                                    |
| <i>d</i> -Y <sub>2</sub> CS <sub>2</sub>   | 1.24                           | 1.54                                  | 1.67                                  | 13.4                                  | 40.8                                 | 5.5                                   | 5.2                                    |
| <i>d</i> -Sc <sub>2</sub> CSe <sub>2</sub> | 1.29                           | 1.16                                  | 1.46                                  | 16.7                                  | 42.1                                 | 7.0                                   | 6.5                                    |
| <i>d</i> -Y <sub>2</sub> CSe <sub>2</sub>  | 1.14                           | 1.29                                  | 1.56                                  | 13.4                                  | 40.8                                 | 5.5                                   | 5.2                                    |
